# Supplementary material for: The Effect of Zinc and Selenium Supplementation Mode on Their Bioavailability in the Rat Prostate. Should Administration Be Joint or Separate?
Source: PubMed Central journal article supplement (PMC5083989; doi:10.3390/nu8100601), 2016-10-04
Supplement: nutrients-08-00601-s001.pdf [file nutrients-08-00601-s001.pdf]

# Supplementary Materials: The Effect of Mode of Zinc and Selenium Supplementation on Their Bioavailability in the Rat Prostate. Should Administration Be Joint or Separate?

Adam Daragó, Andrzej Sapota, Marzenna Nasiadek, Michał Klimczak and Anna Kilanowicz

**Table S1.** Liver and prostate weight (g) (relative weight (g/100 g b.w.)) in rats following zinc gluconate (Zn), sodium selenite (Se) and selenomethionine (SeMet) administration given jointly or separately for 30, 60 and 90 days and then after 90 and 180 days post administration.

|                            | Liver                      | Prostate                  |                           |
|----------------------------|----------------------------|---------------------------|---------------------------|
|                            |                            | V Lobe                    | DL Lobe                   |
| Administration Period      |                            |                           |                           |
| <i>30-day</i>              |                            |                           |                           |
| Control                    | 9.47 ± 0.81 (2.86 ± 0.38)  | 0.43 ± 0.04 (0.13 ± 0.01) | 0.46 ± 0.05 (0.14 ± 0.02) |
| Zn                         | 9.52 ± 0.95 (2.86 ± 0.40)  | 0.37 ± 0.03 (0.11 ± 0.01) | 0.37 ± 0.08 (0.11 ± 0.03) |
| Se                         | 9.98 ± 0.34 (2.70 ± 0.21)  | 0.41 ± 0.03 (0.11 ± 0.02) | 0.37 ± 0.05 (0.10 ± 0.02) |
| SeMet                      | 10.18 ± 0.62 (2.82 ± 0.29) | 0.40 ± 0.04 (0.11 ± 0.02) | 0.36 ± 0.06 (0.10 ± 0.02) |
| Zn + Se                    | 9.56 ± 0.28 (2.68 ± 0.11)  | 0.39 ± 0.03 (0.11 ± 0.02) | 0.36 ± 0.06 (0.10 ± 0.02) |
| Zn + SeMet                 | 9.92 ± 0.42 (2.74 ± 0.24)  | 0.40 ± 0.07 (0.11 ± 0.02) | 0.36 ± 0.09 (0.10 ± 0.03) |
| <i>60-day</i>              |                            |                           |                           |
| Control                    | 10.60 ± 0.91 (2.85 ± 0.16) | 0.41 ± 0.04 (0.11 ± 0.02) | 0.48 ± 0.08 (0.13 ± 0.03) |
| Zn                         | 9.49 ± 0.61 (2.55 ± 0.16)  | 0.35 ± 0.02 (0.09 ± 0.01) | 0.37 ± 0.04 (0.10 ± 0.02) |
| Se                         | 10.34 ± 0.71 (2.66 ± 0.12) | 0.37 ± 0.06 (0.09 ± 0.02) | 0.43 ± 0.06 (0.11 ± 0.02) |
| SeMet                      | 10.63 ± 0.81 (2.74 ± 0.22) | 0.39 ± 0.02 (0.10 ± 0.01) | 0.43 ± 0.05 (0.11 ± 0.02) |
| Zn + Se                    | 9.26 ± 0.72 (2.58 ± 0.18)  | 0.39 ± 0.02 (0.11 ± 0.01) | 0.36 ± 0.09 (0.08 ± 0.03) |
| Zn + SeMet                 | 8.85 ± 0.97 (2.51 ± 0.12)  | 0.38 ± 0.03 (0.09 ± 0.01) | 0.38 ± 0.03 (0.10 ± 0.01) |
| <i>90-day</i>              |                            |                           |                           |
| Control                    | 11.09 ± 0.74 (2.85 ± 0.20) | 0.46 ± 0.04 (0.11 ± 0.01) | 0.47 ± 0.08 (0.11 ± 0.02) |
| Zn                         | 10.13 ± 0.63 (2.69 ± 0.15) | 0.35 ± 0.08 (0.09 ± 0.02) | 0.37 ± 0.09 (0.09 ± 0.02) |
| Se                         | 10.75 ± 0.89 (2.62 ± 0.16) | 0.45 ± 0.06 (0.11 ± 0.02) | 0.37 ± 0.12 (0.09 ± 0.03) |
| SeMet                      | 11.05 ± 0.61 (2.76 ± 0.13) | 0.40 ± 0.02 (0.10 ± 0.01) | 0.37 ± 0.09 (0.08 ± 0.02) |
| Zn + Se                    | 10.48 ± 0.36 (2.62 ± 0.09) | 0.44 ± 0.04 (0.11 ± 0.01) | 0.40 ± 0.07 (0.10 ± 0.02) |
| Zn + SeMet                 | 10.13 ± 0.42 (2.64 ± 0.14) | 0.42 ± 0.03 (0.11 ± 0.01) | 0.42 ± 0.03 (0.11 ± 0.01) |
| Post Administration Period |                            |                           |                           |
| <i>90-day</i>              |                            |                           |                           |
| Control                    | 12.23 ± 0.73 (3.02 ± 0.17) | 0.45 ± 0.02 (0.11 ± 0.02) | 0.45 ± 0.02 (0.11 ± 0.02) |
| Zn                         | 12.02 ± 0.58 (2.79 ± 0.15) | 0.43 ± 0.19 (0.10 ± 0.04) | 0.47 ± 0.19 (0.11 ± 0.04) |
| Se                         | 12.28 ± 0.88 (2.67 ± 0.19) | 0.37 ± 0.07 (0.08 ± 0.02) | 0.46 ± 0.07 (0.10 ± 0.02) |
| SeMet                      | 12.90 ± 0.81 (3.04 ± 0.26) | 0.42 ± 0.15 (0.10 ± 0.03) | 0.42 ± 0.15 (0.10 ± 0.03) |
| Zn + Se                    | 11.70 ± 0.92 (2.80 ± 0.25) | 0.42 ± 0.10 (0.10 ± 0.02) | 0.42 ± 0.10 (0.10 ± 0.02) |
| Zn + SeMet                 | 11.77 ± 0.87 (2.66 ± 0.28) | 0.44 ± 0.01 (0.10 ± 0.01) | 0.44 ± 0.13 (0.10 ± 0.03) |
| <i>180-day</i>             |                            |                           |                           |
| Control                    | 12.58 ± 0.67 (2.88 ± 0.15) | 0.57 ± 0.06 (0.13 ± 0.02) | 0.48 ± 0.10 (0.11 ± 0.03) |
| Zn                         | 12.24 ± 0.71 (2.71 ± 0.17) | 0.45 ± 0.08 (0.10 ± 0.02) | 0.45 ± 0.12 (0.10 ± 0.03) |
| Se                         | 13.45 ± 0.81 (2.67 ± 0.19) | 0.45 ± 0.09 (0.09 ± 0.02) | 0.40 ± 0.09 (0.08 ± 0.02) |
| SeMet                      | 12.39 ± 0.87 (2.72 ± 0.29) | 0.50 ± 0.09 (0.11 ± 0.02) | 0.36 ± 0.09 (0.08 ± 0.02) |
| Zn + Se                    | 13.36 ± 0.52 (2.70 ± 0.15) | 0.59 ± 0.09 (0.12 ± 0.02) | 0.54 ± 0.09 (0.11 ± 0.02) |
| Zn + SeMet                 | 13.79 ± 0.74 (2.82 ± 0.23) | 0.49 ± 0.11 (0.10 ± 0.02) | 0.39 ± 0.11 (0.08 ± 0.02) |

All values are expressed as means ± SD; \* Results statistically significant compared to controls,  $p \leq 0.05$ .

**Table S2.** Copper level in the blood, liver and prostate of rats following zinc gluconate (Zn), sodium selenite (Se) and selenomethionine (SeMet) administration given jointly or separately for 30, 60 and 90 days and then after 90 and 180 days post administration

|                                   | Blood ( $\mu\text{g/mL}$ ) | Liver ( $\mu\text{g/g w.t.}$ ) | Prostate ( $\mu\text{g/g w.t.}$ ) |                 |
|-----------------------------------|----------------------------|--------------------------------|-----------------------------------|-----------------|
|                                   |                            |                                | V lobe                            | DL lobe         |
| <b>Administration Period</b>      |                            |                                |                                   |                 |
| <i>30-day</i>                     |                            |                                |                                   |                 |
| Control                           | 1.02 $\pm$ 0.07            | 4.37 $\pm$ 0.29                | 2.03 $\pm$ 0.37                   | 3.21 $\pm$ 0.48 |
| Zn                                | 1.03 $\pm$ 0.08            | 3.92 $\pm$ 0.50                | 1.98 $\pm$ 0.24                   | 3.41 $\pm$ 0.32 |
| Se                                | 1.00 $\pm$ 0.07            | 4.19 $\pm$ 0.17                | 2.14 $\pm$ 0.34                   | 2.95 $\pm$ 0.24 |
| SeMet                             | 1.01 $\pm$ 0.04            | 3.83 $\pm$ 0.33                | 2.36 $\pm$ 0.29                   | 3.15 $\pm$ 0.26 |
| Zn + Se                           | 1.01 $\pm$ 0.04            | 4.23 $\pm$ 0.37                | 2.34 $\pm$ 0.41                   | 3.16 $\pm$ 0.24 |
| Zn + SeMet                        | 1.02 $\pm$ 0.07            | 4.07 $\pm$ 0.57                | 2.28 $\pm$ 0.41                   | 3.31 $\pm$ 0.39 |
| <i>60-day</i>                     |                            |                                |                                   |                 |
| Control                           | 1.04 $\pm$ 0.08            | 5.21 $\pm$ 0.63                | 2.27 $\pm$ 0.41                   | 3.12 $\pm$ 0.42 |
| Zn                                | 1.05 $\pm$ 0.07            | 5.22 $\pm$ 0.48                | 2.21 $\pm$ 0.56                   | 3.42 $\pm$ 0.56 |
| Se                                | 0.98 $\pm$ 0.04            | 4.39 $\pm$ 0.53                | 2.08 $\pm$ 0.29                   | 3.31 $\pm$ 0.47 |
| SeMet                             | 1.08 $\pm$ 0.08            | 4.72 $\pm$ 0.63                | 2.45 $\pm$ 0.35                   | 3.16 $\pm$ 0.34 |
| Zn + Se                           | 1.01 $\pm$ 0.05            | 5.36 $\pm$ 0.70                | 2.31 $\pm$ 0.51                   | 3.37 $\pm$ 0.48 |
| Zn + SeMet                        | 1.05 $\pm$ 0.04            | 4.47 $\pm$ 0.43                | 2.45 $\pm$ 0.34                   | 3.42 $\pm$ 0.49 |
| <i>90-day</i>                     |                            |                                |                                   |                 |
| Control                           | 1.03 $\pm$ 0.05            | 3.79 $\pm$ 0.28                | 2.24 $\pm$ 0.37                   | 2.98 $\pm$ 0.39 |
| Zn                                | 0.99 $\pm$ 0.04            | 3.72 $\pm$ 0.62                | 2.04 $\pm$ 0.27                   | 3.35 $\pm$ 0.62 |
| Se                                | 0.99 $\pm$ 0.05            | 3.56 $\pm$ 0.24                | 2.38 $\pm$ 0.38                   | 3.15 $\pm$ 0.38 |
| SeMet                             | 1.01 $\pm$ 0.05            | 3.58 $\pm$ 0.40                | 2.40 $\pm$ 0.40                   | 3.24 $\pm$ 0.41 |
| Zn + Se                           | 1.08 $\pm$ 0.08            | 3.66 $\pm$ 0.41                | 2.34 $\pm$ 0.43                   | 3.20 $\pm$ 0.41 |
| Zn + SeMet                        | 1.09 $\pm$ 0.08            | 3.56 $\pm$ 0.45                | 2.47 $\pm$ 0.51                   | 3.41 $\pm$ 0.53 |
| <b>Post Administration Period</b> |                            |                                |                                   |                 |
| <i>90-day</i>                     |                            |                                |                                   |                 |
| Control                           | 1.07 $\pm$ 0.08            | 3.59 $\pm$ 0.35                | 2.18 $\pm$ 0.37                   | 3.06 $\pm$ 0.41 |
| Zn                                | 0.99 $\pm$ 0.05            | 4.02 $\pm$ 0.15                | 2.05 $\pm$ 0.28                   | 2.93 $\pm$ 0.37 |
| Se                                | 0.99 $\pm$ 0.06            | 3.79 $\pm$ 0.51                | 2.43 $\pm$ 0.29                   | 3.09 $\pm$ 0.43 |
| SeMet                             | 1.07 $\pm$ 0.05            | 3.91 $\pm$ 0.39                | 2.01 $\pm$ 0.39                   | 3.34 $\pm$ 0.55 |
| Zn + Se                           | 0.98 $\pm$ 0.04            | 3.71 $\pm$ 0.16                | 2.08 $\pm$ 0.39                   | 3.13 $\pm$ 0.36 |
| Zn + SeMet                        | 1.00 $\pm$ 0.04            | 3.66 $\pm$ 0.24                | 2.35 $\pm$ 0.24                   | 3.38 $\pm$ 0.49 |
| <i>180-day</i>                    |                            |                                |                                   |                 |
| Control                           | 1.07 $\pm$ 0.08            | 4.37 $\pm$ 0.63                | 1.89 $\pm$ 0.42                   | 2.94 $\pm$ 0.39 |
| Zn                                | 1.01 $\pm$ 0.02            | 4.97 $\pm$ 0.78                | 2.08 $\pm$ 0.41                   | 3.02 $\pm$ 0.42 |
| Se                                | 0.98 $\pm$ 0.04            | 5.31 $\pm$ 1.28                | 2.24 $\pm$ 0.39                   | 3.09 $\pm$ 0.39 |
| SeMet                             | 1.05 $\pm$ 0.04            | 5.8 $\pm$ 1.05                 | 2.19 $\pm$ 0.41                   | 3.13 $\pm$ 0.45 |
| Zn + Se                           | 1.01 $\pm$ 0.02            | 4.65 $\pm$ 1.07                | 2.13 $\pm$ 0.27                   | 2.88 $\pm$ 0.32 |
| Zn + SeMet                        | 1.01 $\pm$ 0.03            | 5.03 $\pm$ 0.39                | 1.96 $\pm$ 0.39                   | 3.21 $\pm$ 0.46 |

All values are expressed as means  $\pm$  SD; \* Results statistically significant compared to controls,  $p \leq 0.05$ .
